# Supplementary material for: Adenoviral delivery of an immunomodulatory protein to the tumor microenvironment controls tumor growth
Source: PubMed Central journal article supplement — Mol Ther Oncolytics. 2021 Dec 6;24:180–93. doi: 10.1016/j.omto.2021.12.004 (PMC8741417; doi:10.1016/j.omto.2021.12.004), 2021-12-06
Supplement: mmc1.pdf [file mmc1.pdf]

**OMTO, Volume 24**

**Supplemental information**

**Adenoviral delivery of an immunomodulatory  
protein to the tumor microenvironment  
controls tumor growth**

**Patrick O'Connell, Maja K. Blake, Yuliya Pepelyayeva, Sean Hyslop, Sarah Godbehere, Ariana M. Angarita, Cristiane Pereira-Hicks, Andrea Amalfitano, and Yasser A. Aldhamen**

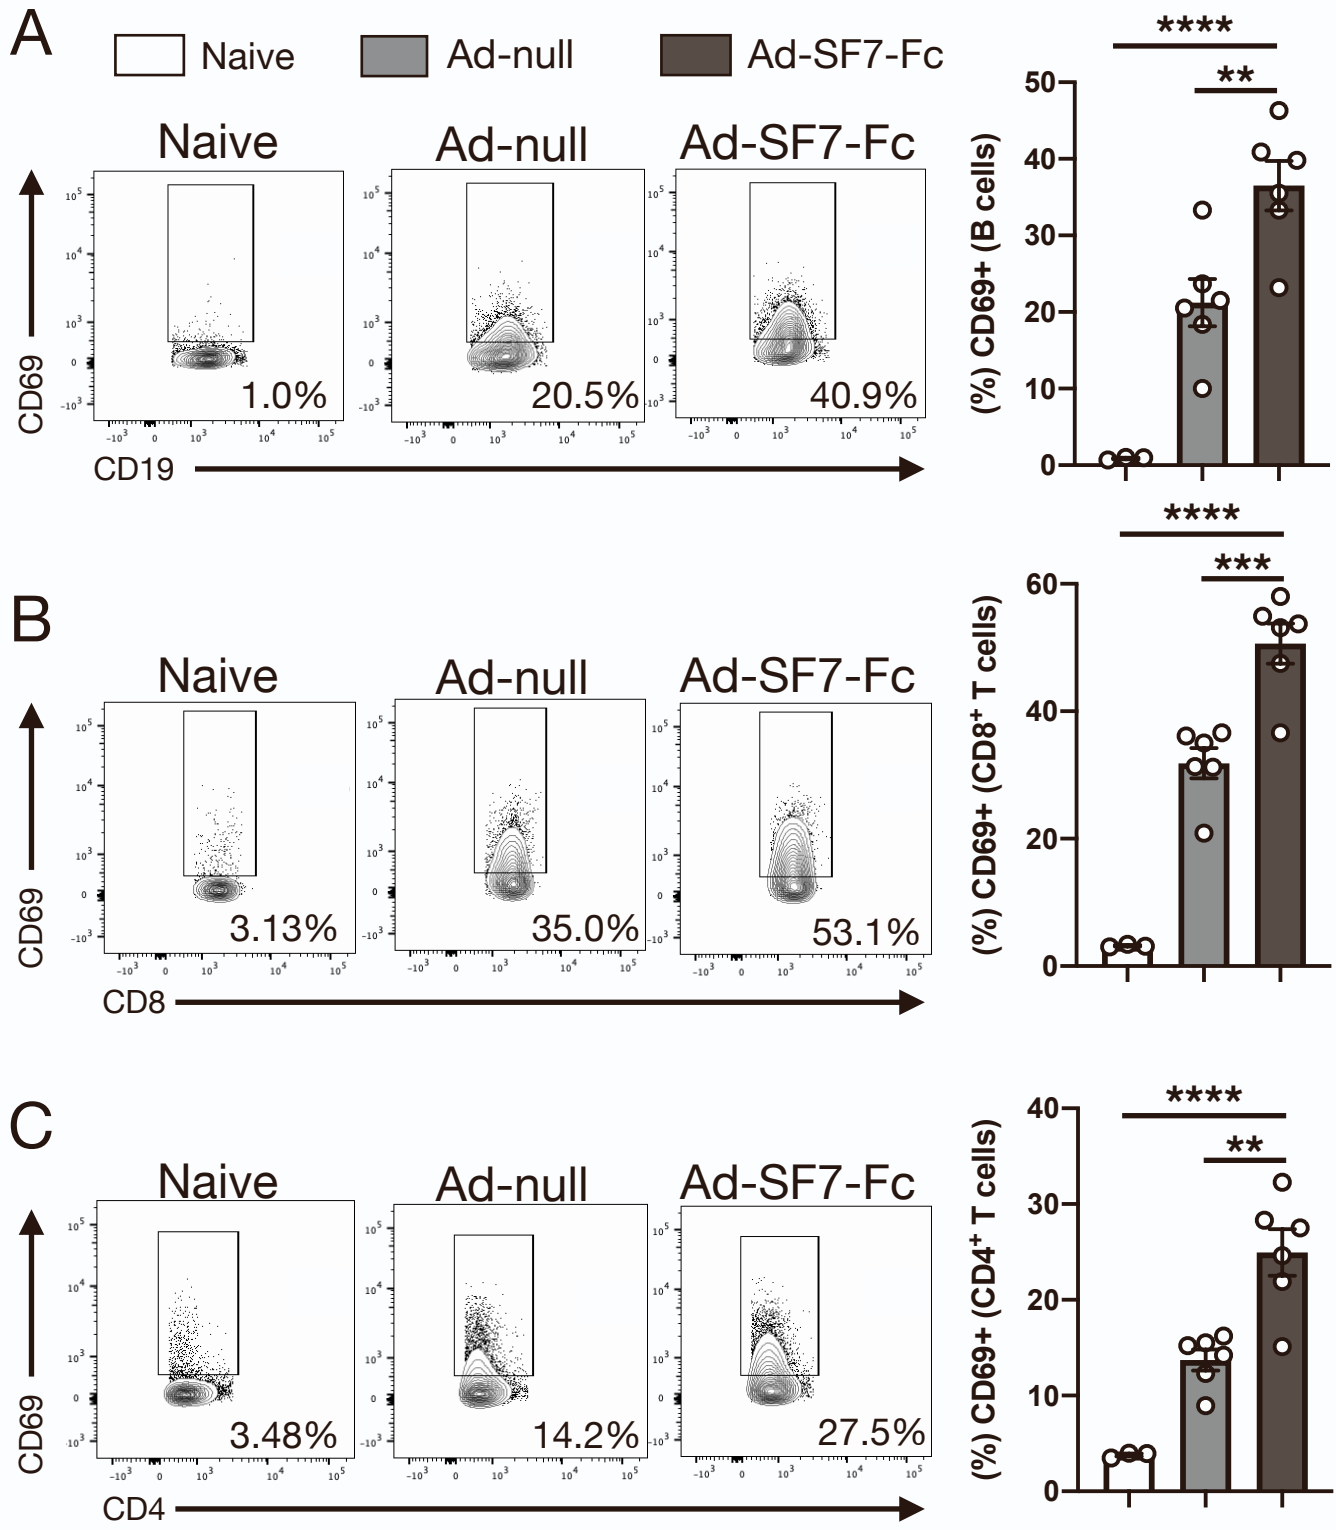

**Supplemental Figure 1 (Related to Figure 1). Ad-SF7-Fc activated B and T cells.**  
 (A) CD69 expression on splenic B cells following I.V. injection of either Ad-null or Ad-SF7-Fc.  
 (B) CD69 expression on CD8<sup>+</sup> T cells following I.V. injection of either Ad-null or Ad-SF7-Fc.  
 (C) CD69 expression on CD4<sup>+</sup> T cells following I.V. injection of either Ad-null or Ad-SF7-Fc. All data presented as mean  $\pm$  SEM and representative of a single experiment. Groups compared with one-way ANOVA with Tukey's multiple comparison test. \*\* $p < 0.01$ ; \*\*\* $p < 0.001$ ; \*\*\*\* $p < 0.0001$ .

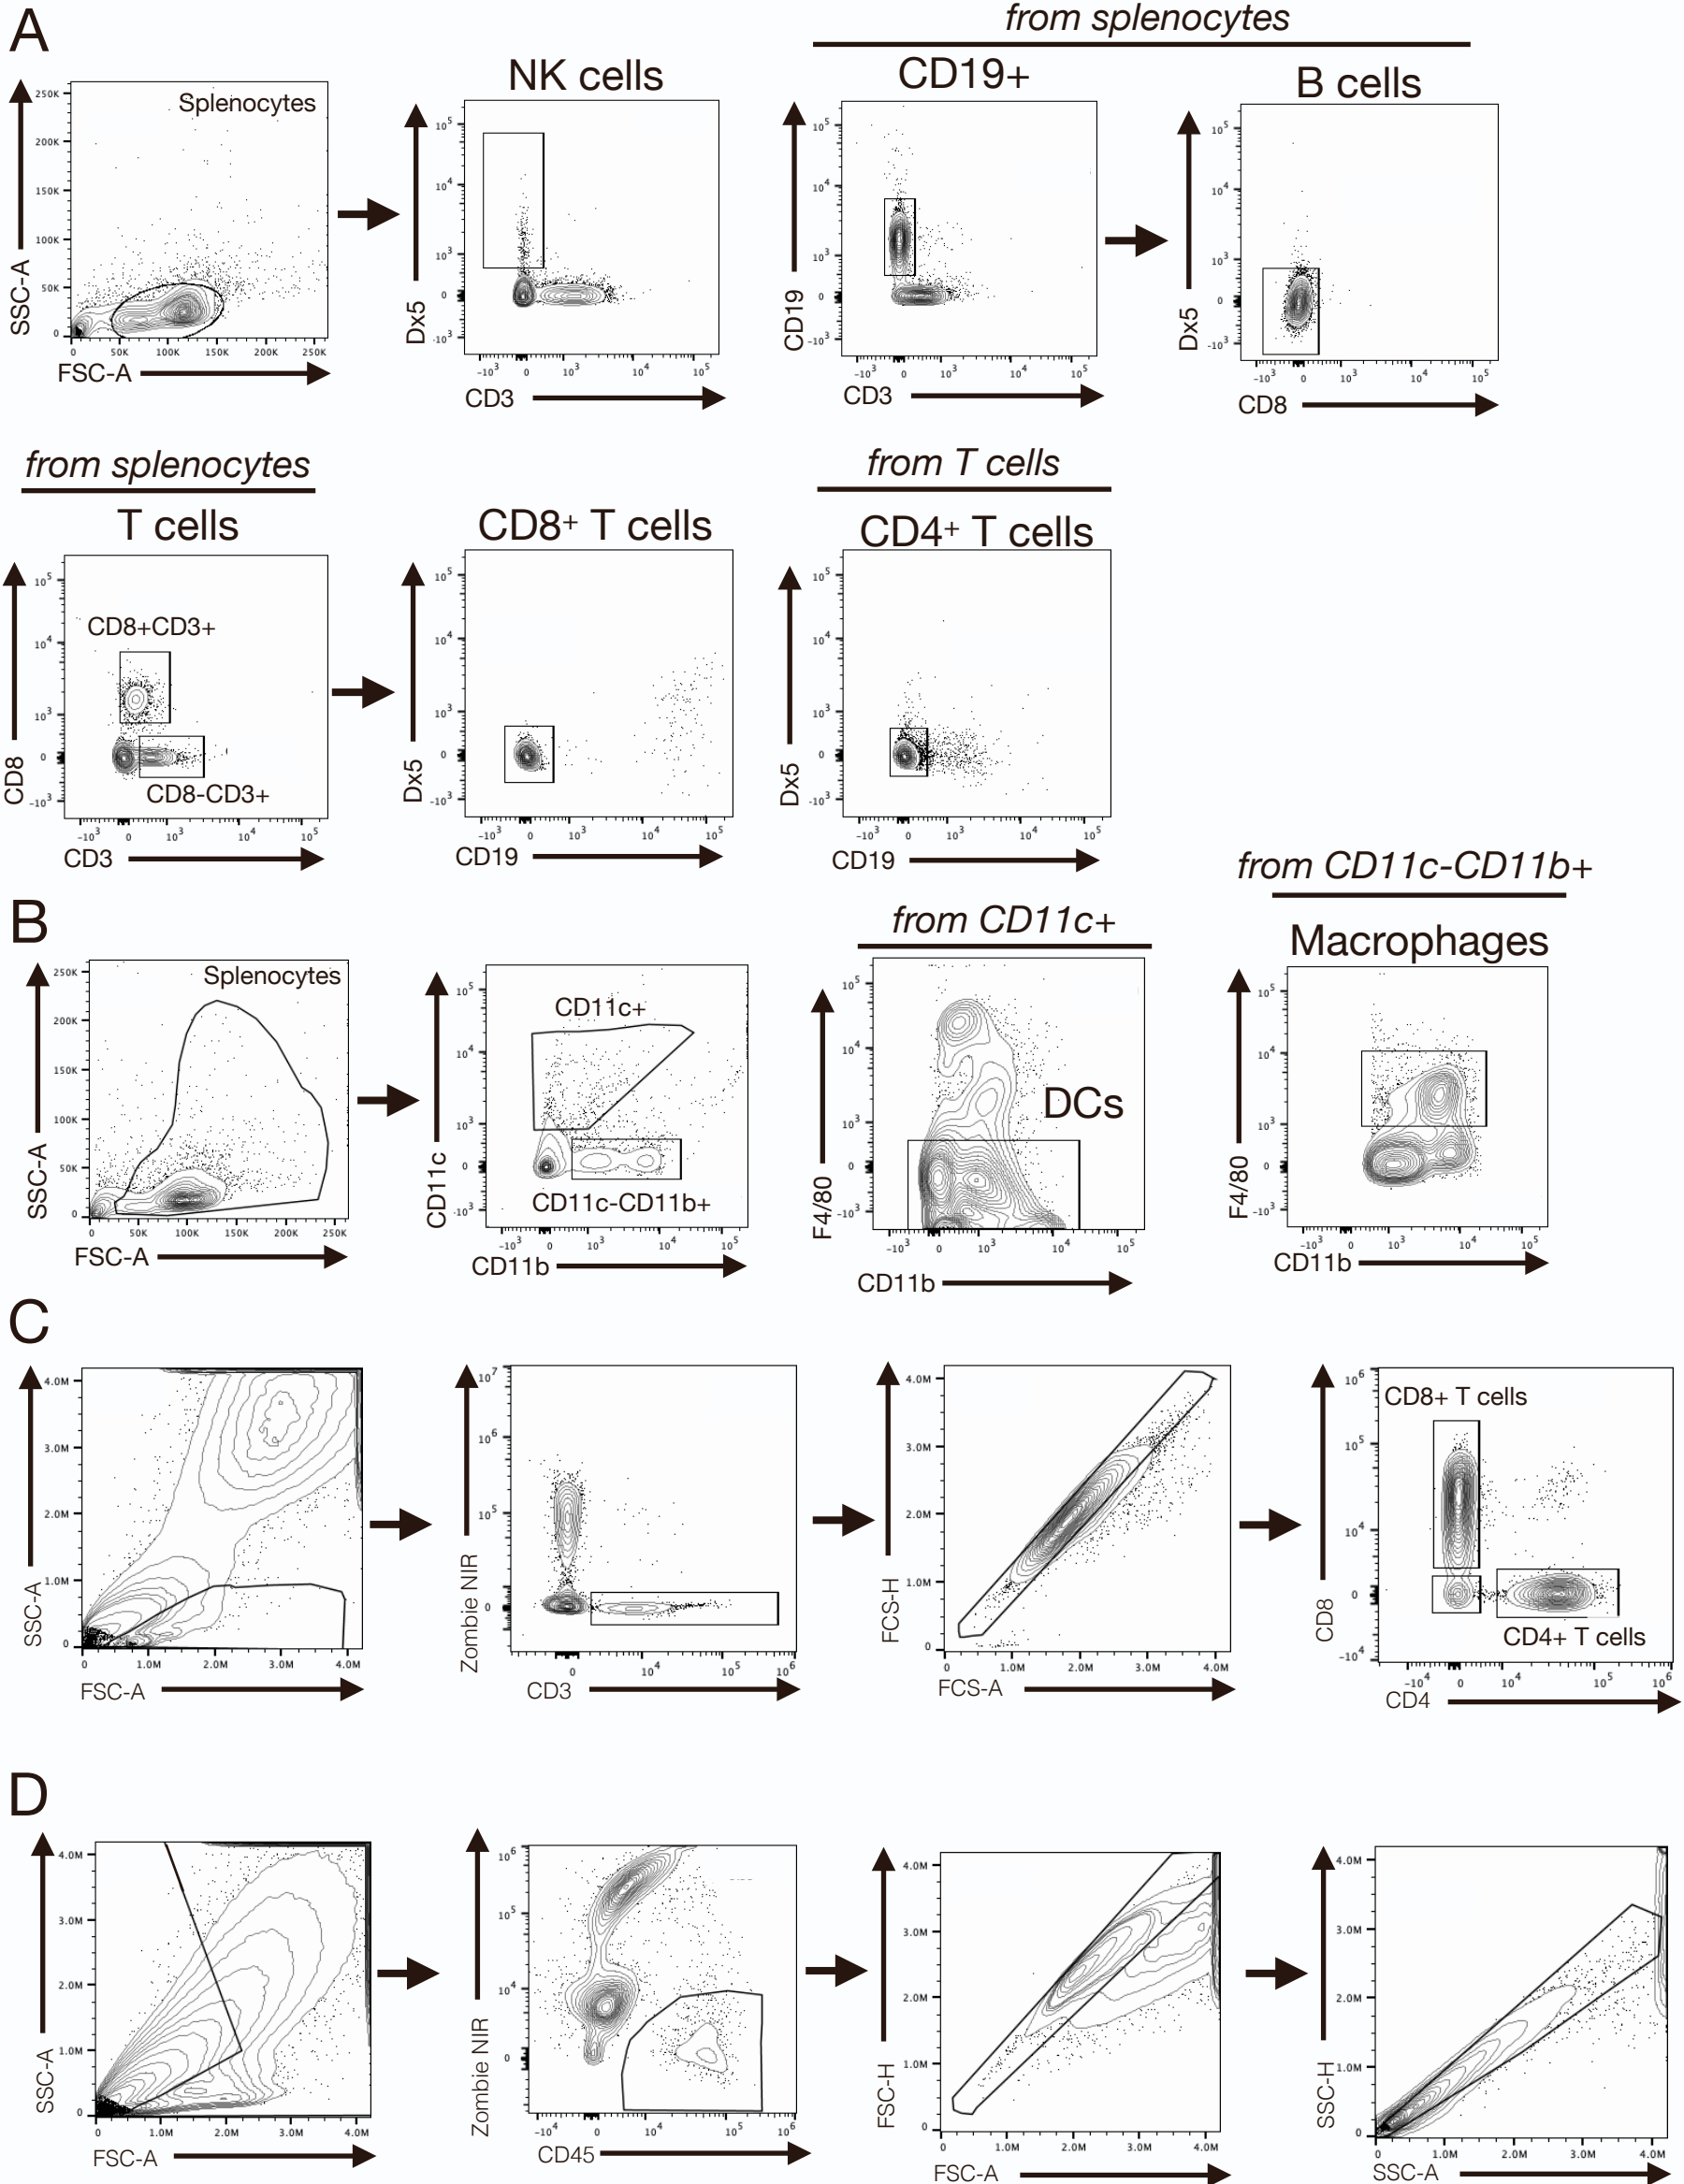

**Supplemental Figure 2. Flow cytometry and spectral cytometry gating strategies.**

(A) Flow cytometry gating approach used for lymphocytes in Fig. 1 and Supplemental Fig. 1. (B) Flow cytometry gating approach used for myeloid cells in Fig. 1. (C) Spectral cytometry gating approach used for B16 TIL T cell analysis in Fig. 4C-G and Supplemental Fig. 4. (D) Spectral cytometry gating approach used for B16 high dimensional TME profiling in Fig. 4H-J, Fig. 5, Fig. 7, Supplemental Fig. 5, and Supplemental Fig. 6. We utilized a broad-based strategy so as to capture all tumor-infiltrating immune cells, and cleaned up data with an additional singlet gate.

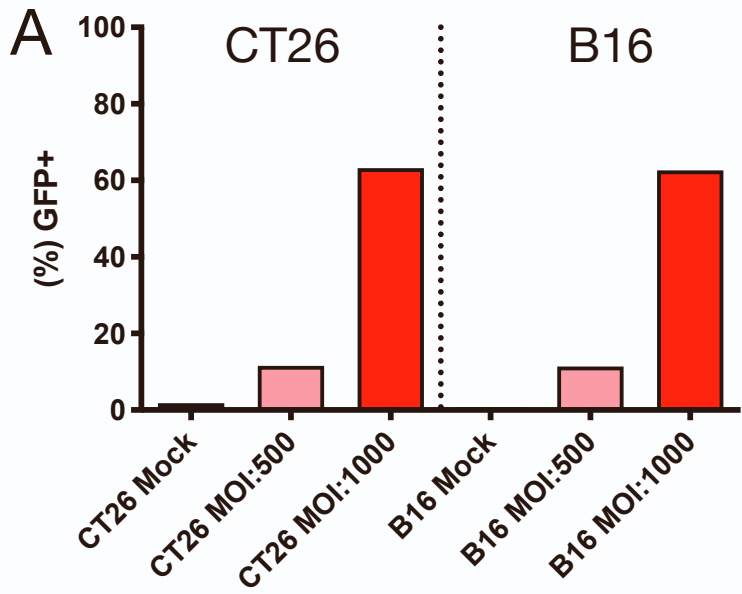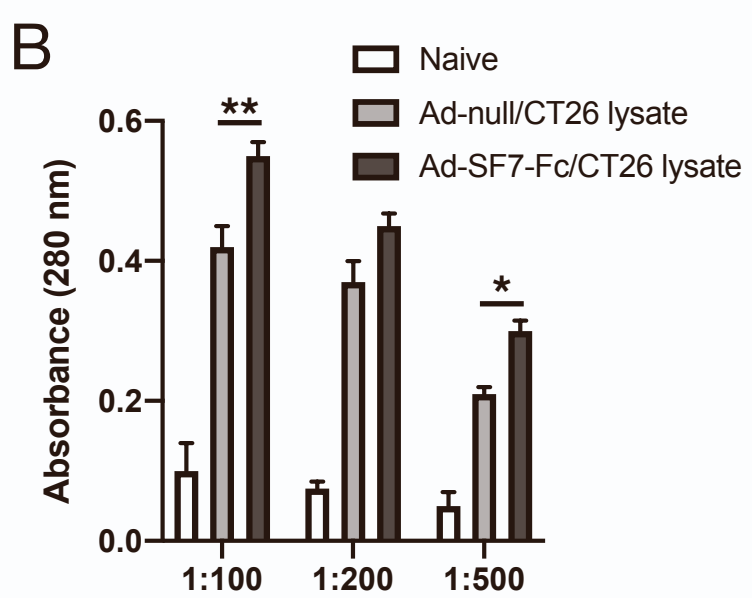

**Supplemental Figure 3 (Related to Figure 3). CT26-specific IgG responses following adenovirus vaccination and Ad infection testing of CT26 and B16.**

(A) CT26 and B16 tumor cells were infected in vitro for 18 hrs with varying MOI's of Ad-GFP to determine optimal dose for tumor cell transduction and treatment. (B) Relative abundance of tumor specific IgG antibodies in plasma of non-vaccinated (naive) (n=2), Ad-null/CT26 lysate (n=6), and Ad-SF7-Fc/CT26 lysate (n=7) vaccinated mice using different dilutions. All data presented as mean  $\pm$  SEM and representative of a single experiment. Groups compared with one-way ANOVA with Tukey's multiple comparison test. \*p<0.05; \*\*p<0.01.

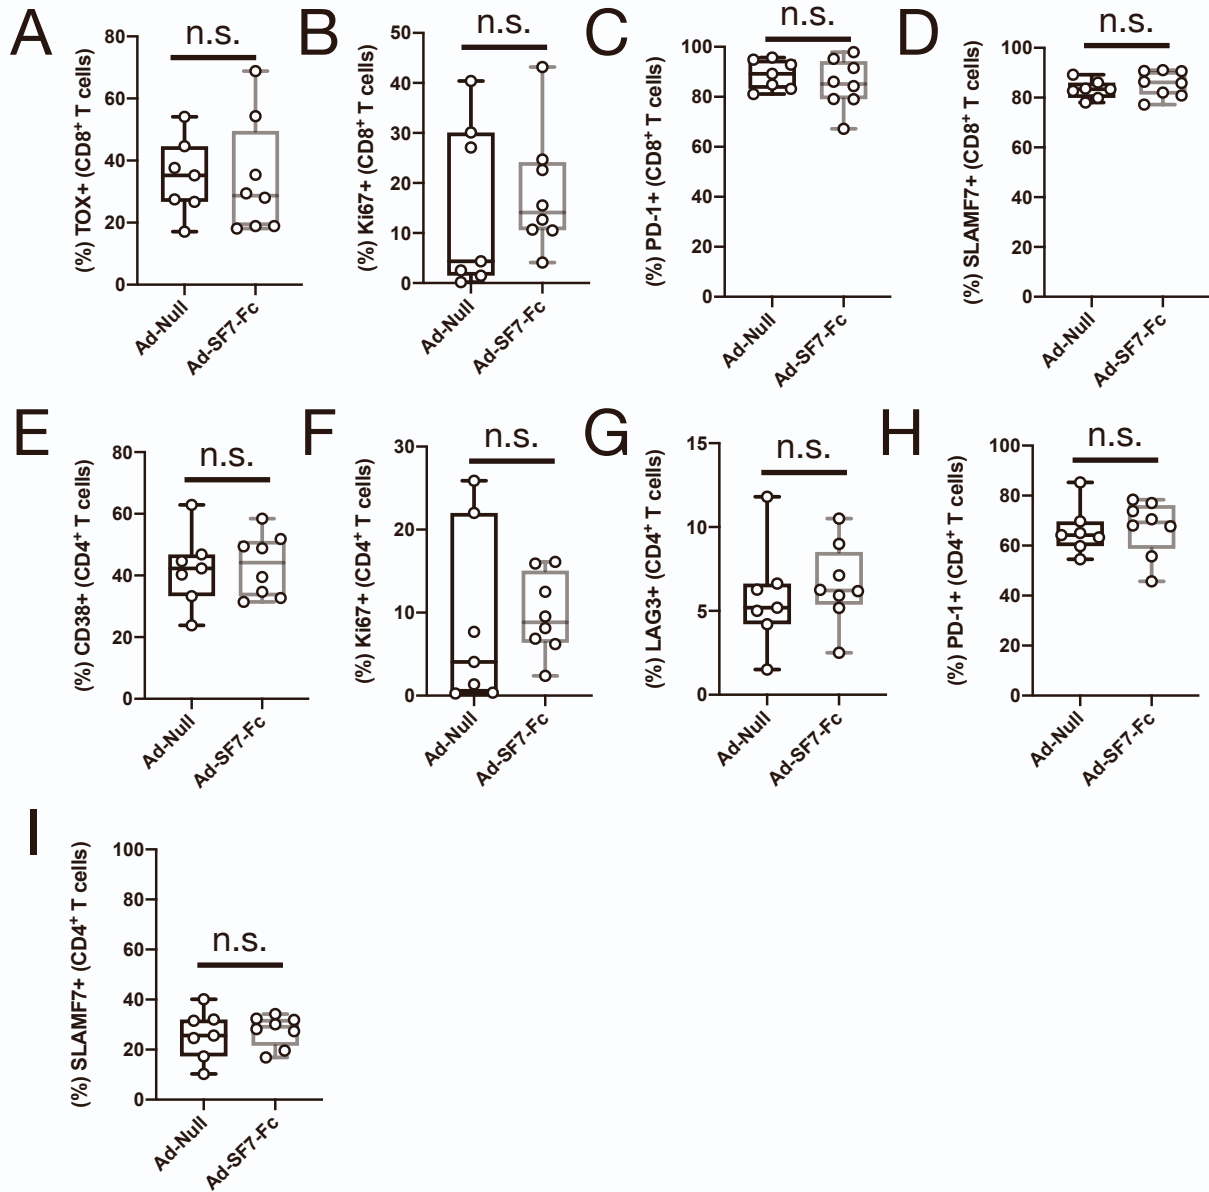

**Supplemental Figure 4 (Related to Figure 4). CD4+ and CD8+ B16 TIL phenotypes from adenovirus treated mice.**

(A) Frequency of TOX+ CD8+ TILs between Ad-null and Ad-SF7-Fc treated B16 tumors. (B) Frequency of Ki67+ CD8+ TILs between Ad-null and Ad-SF7-Fc treated B16 tumors.

(C) Frequency of PD-1+ CD8+ TILs between Ad-null and Ad-SF7-Fc treated B16 tumors. (D) Frequency of SLAMF7+ CD8+ TILs between Ad-null and Ad-SF7-Fc treated B16 tumors. (E) Frequency of CD38+ CD4+ TILs between Ad-null and Ad-SF7-Fc treated B16 tumors. (F) Frequency of Ki67+ CD4+ TILs between Ad-null and Ad-SF7-Fc treated B16 tumors. (G) Frequency of LAG3+ CD4+ TILs between Ad-null and Ad-SF7-Fc treated B16 tumors. (H) Frequency of PD-1+ CD4+ TILs between Ad-null and Ad-SF7-Fc treated B16 tumors. (I) Frequency of SLAMF7+ CD4+ TILs between Ad-null and Ad-SF7-Fc treated B16 tumors.

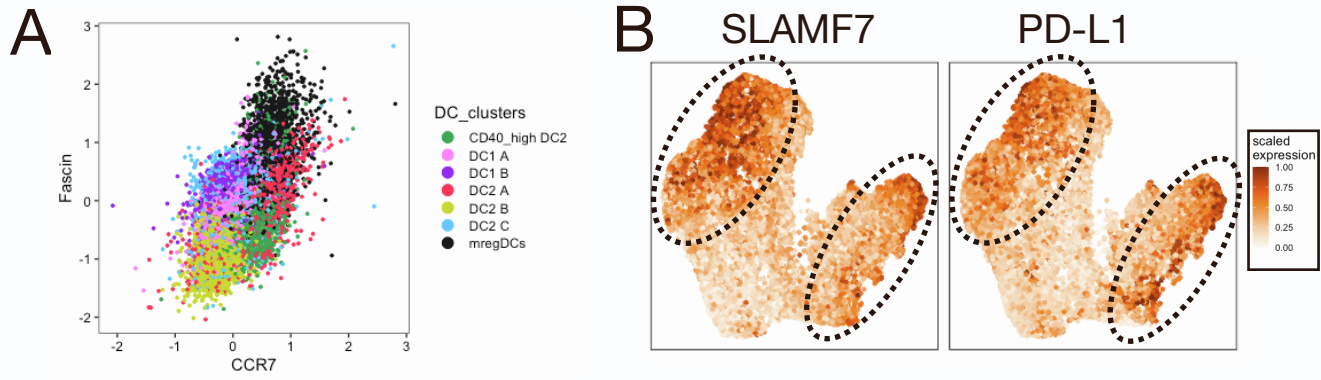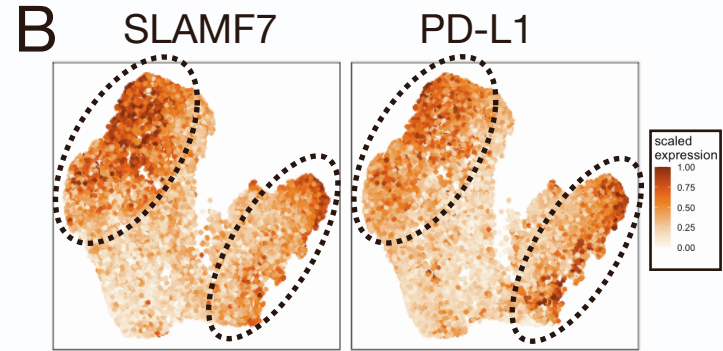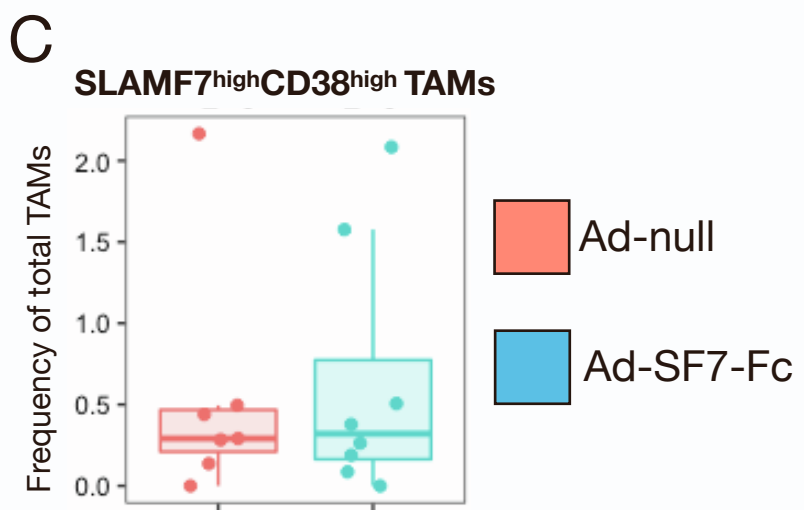

**Supplemental Figure 5 (Related to Figure 5). mregDC identification and SLAMF7/PD-L1 co-expression on TAMs.**

(A) Dot plot of Fascin and CCR7 co-expression on DC subsets from adenovirus treated tumors. Points are colored by DC subset. mregDCs are defined by high co-expression of both of these markers.18 (B) Expression of SLAMF7 and PD-L1 overlaid onto UMAP plot of TAM subsets as depicted in Figure 5G. (C) Frequency of SLAMF7<sup>high</sup>CD38<sup>high</sup> TAMs between Ad-null and Ad-SF7-Fc treated B16 tumors.

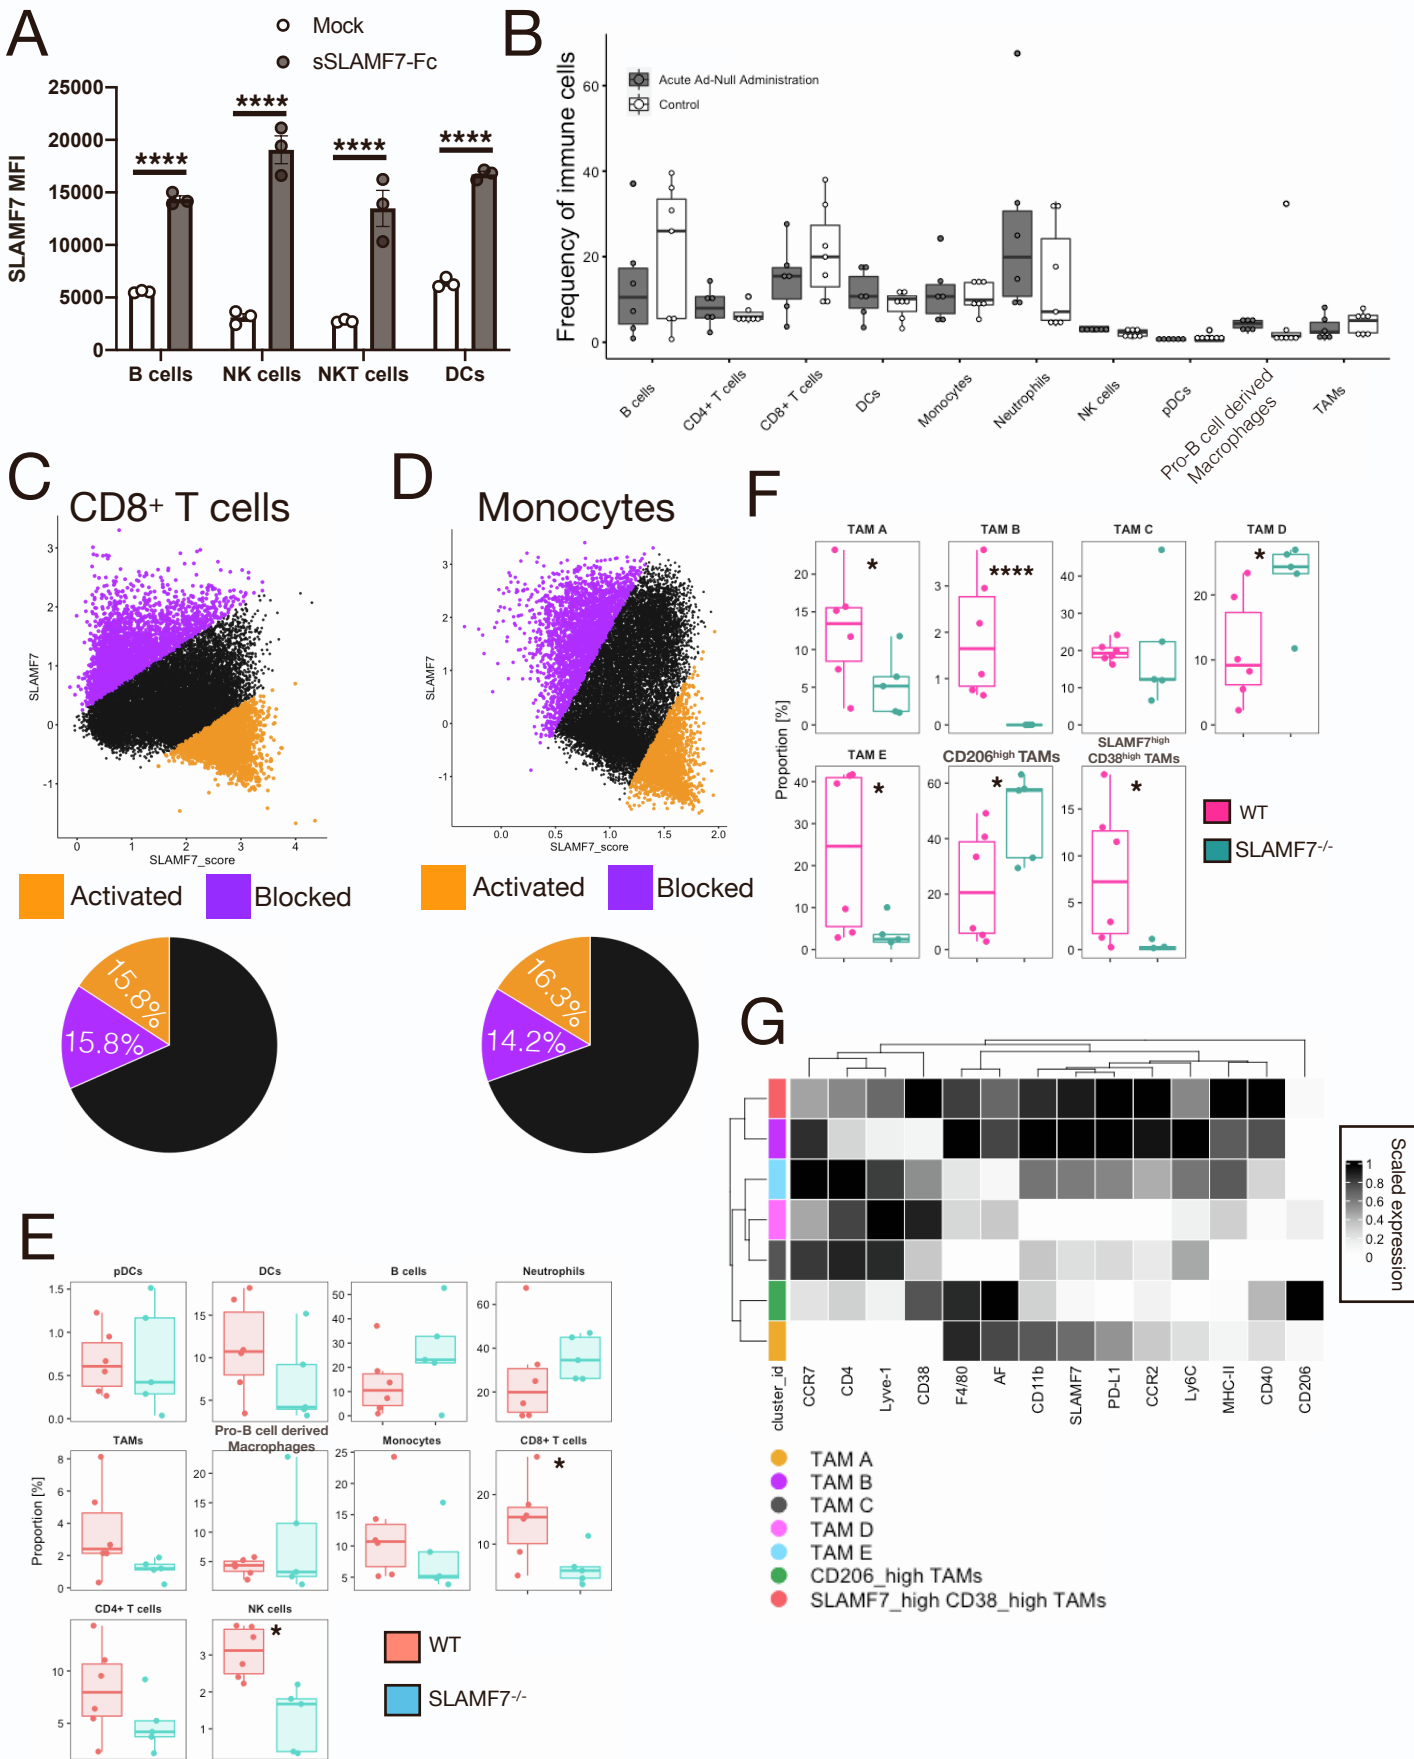

**Supplemental Figure 6 (Related to Figure 7). Supporting data for SF7-Fc predictions and TME changes in B16 tumors of SLAMF7<sup>-/-</sup> mice.**

(A) Expression of SLAMF7 on splenic immune cell subsets from WT mice, in vitro stimulated with 10  $\mu$ g/mL soluble SLAMF7-Fc protein (sSLAMF7-Fc) for two days. (B) Frequency of TME immune cell subsets between mice who received a single injection of Ad-null at day 7 post B16 tumor inoculation (Control) and mice who also received a second injection 24 hrs before sacrifice (Acute Ad Null Administration). Activating versus blocking predictions of SF7-Fc in CD8<sup>+</sup> T cells (C) and Monocytes (D) depicted as in Fig. 7B-E. (E) Frequency of tumor-infiltrating immune cell subsets from B16 tumors of WT (Ad-null) and SLAMF7<sup>-/-</sup> (Ad-null) mice assessed by spectral cytometry similarly to Fig. 4J. (F) Frequency of TAM subsets from B16 tumors between WT (Ad-null) and SLAMF7<sup>-/-</sup> (Ad-null) mice. (G) Marker expression on TAM subsets from (F). Data in (A, F-G) representative of a single experiment. Data in (B) aggregated from multiple experiments. Data in (C and D) representative of two independent experiments showing similar results. Data in (A) presented as mean  $\pm$  SEM and groups compared with two-way ANOVA with Sidak's multiple comparison test. Groups in (E and F) compared with a GLMM. \* $p < 0.05$ ; \*\*\*\* $p < 0.0001$ . AF; autofluorescence.

**Supplemental table 2. iEN model coefficients. Only non-0 coefficients are included.**

| <b>Feature</b>                       | <b>Beta</b> | <b>Interpretation</b> |
|--------------------------------------|-------------|-----------------------|
| CD8+ T cells                         | 0.636777322 | Inc. in responders    |
| PD-L1_TAMs                           | 0.576284123 | Inc. in responders    |
| B220_B cells                         | 0.574742634 | Inc. in responders    |
| IL_12p40_lystate                     | 0.429617979 | Inc. in responders    |
| SLAMF7_TAMs                          | 0.3491533   | Inc. in responders    |
| IgD_B cells                          | 0.278947827 | Inc. in responders    |
| CD11c_TAMs                           | 0.272528427 | Inc. in responders    |
| Tex_prog1                            | 0.207656434 | Inc. in responders    |
| Ly6C_pDCs                            | 0.195718603 | Inc. in responders    |
| Pro-B cell derived Macrophages       | 0.193926537 | Inc. in responders    |
| IL_10_lystate                        | 0.181000311 | Inc. in responders    |
| IFNg_lystate                         | 0.177540472 | Inc. in responders    |
| TAMs_activated                       | 0.160726842 | Inc. in responders    |
| MIP_1a_lystate                       | 0.154900386 | Inc. in responders    |
| MCP_1_lystate                        | 0.136453361 | Inc. in responders    |
| CD45_TAMs                            | 0.134739305 | Inc. in responders    |
| Ly6C_CD8+ T cells                    | 0.134206359 | Inc. in responders    |
| TOX+_CD8                             | 0.115547706 | Inc. in responders    |
| IL_6_lystate                         | 0.114914635 | Inc. in responders    |
| SLAMF7_DCs                           | 0.098996632 | Inc. in responders    |
| Tex_int                              | 0.079320436 | Inc. in responders    |
| pDCs_activated                       | 0.076432825 | Inc. in responders    |
| PD-L1_Pro-B cell derived Macrophages | 0.059414611 | Inc. in responders    |
| MHC-II_TAMs                          | 0.058278209 | Inc. in responders    |
| CCR2_TAMs                            | 0.053394087 | Inc. in responders    |
| CD8_T_cells_activated                | 0.043799318 | Inc. in responders    |
| GM-CSF_lystate                       | 0.0425075   | Inc. in responders    |
| Eotaxin_lystate                      | 0.041849572 | Inc. in responders    |
| B220_Pro-B cell derived Macrophages  | 0.033258237 | Inc. in responders    |
| CD38_B cells                         | 0.02633125  | Inc. in responders    |
| CD11b_TAMs                           | 0.021632477 | Inc. in responders    |



|                                       |              |                    |
|---------------------------------------|--------------|--------------------|
| AF_B cells                            | 0.021309016  | Inc. in responders |
| Ly6G_Neutrophils                      | 0.021267713  | Inc. in responders |
| MIP_1b_lysate                         | 0.021107824  | Inc. in responders |
| PD-1_CD8+ T cells                     | 0.015923065  | Inc. in responders |
| CD90_CD8+ T cells                     | 0.013698046  | Inc. in responders |
| CD11c_NK cells                        | 0.011434616  | Inc. in responders |
| TNF_a_plasma_day1                     | 0.010473118  | Inc. in responders |
| CD90_CD4+ T cells                     | 0.010203013  | Inc. in responders |
| IL_3_lysate                           | 0.009106385  | Inc. in responders |
| G_CSF_lysate                          | 0.008431265  | Inc. in responders |
| TOX_high_PD1_high_CD8                 | 0.007180879  | Inc. in responders |
| CCR2_DCs                              | 0.006887445  | Inc. in responders |
| IL_4_lysate                           | 0.004009159  | Inc. in responders |
| MHC-II_DCs                            | 0.003805041  | Inc. in responders |
| CCR2_Monocytes                        | 0.003246796  | Inc. in responders |
| CD90_NK cells                         | 0.000369813  | Inc. in responders |
| CCL5_plasma_day0                      | -0.017050343 | Dec. in responders |
| TAMs                                  | -0.019593439 | Dec. in responders |
| CD206_TAMs                            | -0.02316422  | Dec. in responders |
| CD38_pDCs                             | -0.025184203 | Dec. in responders |
| IL_4_plasma_day0                      | -0.034607044 | Dec. in responders |
| Tex_prog2                             | -0.043115321 | Dec. in responders |
| TNF_a_plasma_day0                     | -0.056736883 | Dec. in responders |
| IL_1b_plasma_day0                     | -0.136661524 | Dec. in responders |
| IL_12p70_lysate                       | -0.1835637   | Dec. in responders |
| Neutrophils                           | -0.229220797 | Dec. in responders |
| Lyve-1_Pro-B cell derived Macrophages | -0.236662769 | Dec. in responders |
| IL_12p40_plasma_day0                  | -0.325532592 | Dec. in responders |
| B220_pDCs                             | -0.335022487 | Dec. in responders |
| IL_1a_lysate                          | -0.38754388  | Dec. in responders |

**Supplemental table 3. List of all antibodies used.**

| <b>Antibody</b>            | <b>Conjugate</b> | <b>Source</b>  |
|----------------------------|------------------|----------------|
| CD3 (clone 145-2C11)       | APC              | BD Biosciences |
| CD38 (clone 90/CD38)       | BV510            | BD Biosciences |
| CD8a (clone 53-6.7)        | Alexa 700        | Thermofisher   |
| CD11c (clone HL3)          | PE-Cy7           | BD Biosciences |
| CD11b (clone M1/70)        | APC-Cy7          | BD Biosciences |
| F4/80 (Clone BMB)          | PE               | Thermofisher   |
| CD86 (Clone GL1)           | V450             | BD Biosciences |
| CD3e (clone SK7)           | APC-Cy7          | BD Biosciences |
| CD19 (clone 1D3)           | PerCp-Cy5.5      | BD Biosciences |
| Dx5 (a.k.a. CD49b)         | PE-Cy7           | Thermofisher   |
| CD69 (clone H1.2F3)        | FITC             | BD Biosciences |
| IFNg (clone XMG1.2)        | Alexa 488        | BD Biosciences |
| CD45 (clone 30-F11)        | Alexa 532        | Thermofisher   |
| CD11b (clone M1/70)        | BV570            | BioLegend      |
| CD4 (clone RM4-5)          | eFluor450        | Thermofisher   |
| NK1.1 (clone PK136)        | PE-Cy7           | Thermofisher   |
| SLAMF7 (clone 4G2)         | APC              | BioLegend      |
| Ly6C (clone HK1.4)         | BV421            | BioLegend      |
| Zombie NIR (viability)     | N/A              | BioLegend      |
| Ly6G (clone 1A8)           | BV711            | BioLegend      |
| MHC-II (clone M4/114.15.2) | BV785            | BioLegend      |
| CD3 (clone 17A2)           | BUV737           | BD Biosciences |
| CD11c (clone HL3)          | PE-CF594         | BD Biosciences |
| B220 (clone RA3-6B2)       | BV480            | BD Biosciences |
| IgD (clone 11-26c)         | SuperBright 436  | Thermofisher   |
| CD206 (clone C06802)       | Alexa 647        | BioLegend      |
| CCR2 (clone 747967)        | BV750            | BD Biosciences |
| Lyve1 (clone ALY7)         | eFluor615        | Thermofisher   |
| CD90.2 (clone 53-2.1)      | BUV396           | BD Biosciences |
| PD-1 (clone RMP1-30)       | PerCp-eFluor710  | Thermofisher   |
| LAG3 (clone C9B7W)         | BV785            | BioLegend      |

|                            |             |                    |
|----------------------------|-------------|--------------------|
| Ki67 (clone B56)           | BV421       | BD Biosciences     |
| 2B4 (clone m2B4 (B6)458.1) | FITC        | BioLegend          |
| TOX (clone TXRX10)         | eFluor660   | Thermofisher       |
| SLAMF6 (clone 13B3)        | BUV395      | BD Biosciences     |
| CD69 (clone H1.2F3)        | PE-Cy7      | BD Biosciences     |
| CD40 (clone 3/23)          | APC-Fire750 | BioLegend          |
| Fascin (clone 55K-2)       | Alexa 488   | Santa Cruz Biotech |
| CCR7 (clone 4B12)          | BV605       | BD Biosciences     |
| PD-L1 (clone 10F.9G2)      | BV650       | BD Biosciences     |
| EAT-2 (clone LS-C87204)    | Alexa647    | LSBio              |

**Supplemental table 4. IHC antibodies and staining specifications.**

| Primary Ab                                         | Vendor                                  | Pretreatment                                                                                                                                 | Primary                  | Staining system (BioCare Medical)                                                                                                                                                            |
|----------------------------------------------------|-----------------------------------------|----------------------------------------------------------------------------------------------------------------------------------------------|--------------------------|----------------------------------------------------------------------------------------------------------------------------------------------------------------------------------------------|
| Rabbit anti – CD3<br>Polyclonal                    | Abcam<br>#GR3194253-3<br>Cambridge, MA  | Heat Retrieval – Citrate Buffer pH 6.0 – Pascal Pressure Cooker – 125°C for 15 sec, 80°C for 1 min, room temperature with lid off for 30 min | 1:450 in NAD<br>– 1 Hour | Rodent Block M – 20 minutes<br>ProMark Rabbit on Rodent HRP Polymer™ - 35 minutes<br>AEC Chromogen – 5 minutes CATHE Hematoxylin 1:10 – 1 minute                                             |
| Rat anti – CD8<br>Monoclonal                       | Dianova<br>#DIA-808<br>Hamburg, Germany | Heat Retrieval – Citrate Buffer pH 6.0 – Steamer for 30 min, room temperature with lid off for 10 min                                        | 1:100 in NAD<br>- 1 Hour | Rodent Block M – 10 minutes<br>ProMark Rat on Mouse HRP Probe™ - 10 minutes<br>ProMark Rat on Mouse HRP Polymer™ - 10 minutes<br>AEC Chromogen – 5 minutes CATHE Hematoxylin 1:10 – 1 minute |
| Rabbit anti – Integrin Alpha 2 (DX5)<br>Monoclonal | Abcam<br>#GR196223-25<br>Cambridge, MA  | No Pretreatment                                                                                                                              | 1:100 in NAD<br>– 1 Hour | Rodent Block M – 20 minutes<br>ProMark Rabbit on Rodent HRP Polymer™ - 20 minute<br>AEC Chromogen – 5 minutes CATHE Hematoxylin 1:10 – 1 minute                                              |
